# Supplementary material
Source: PubMed Central journal article supplement (PMC2268149)

(a)

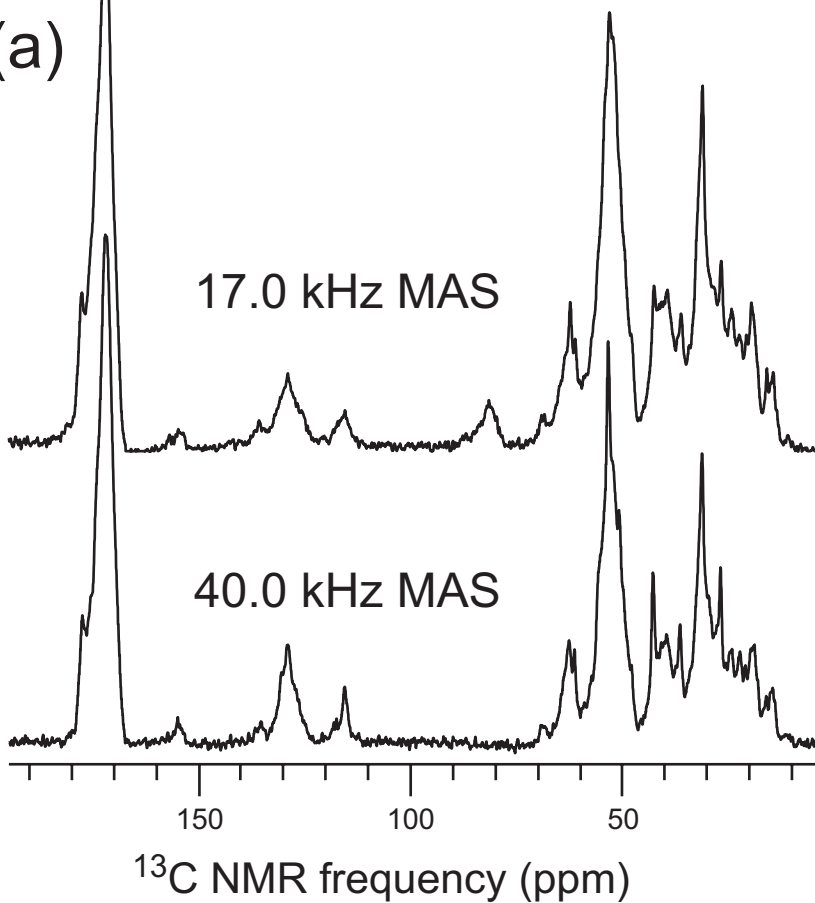

(b)

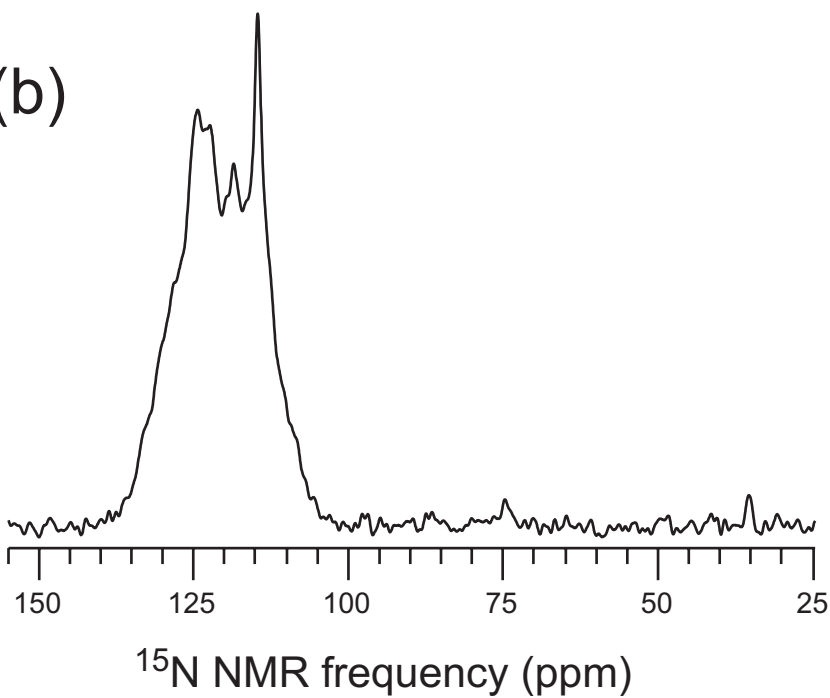

Supplement: supp_0712032105_12032Fig10.pdf [file supp_0712032105_12032Fig10.pdf]

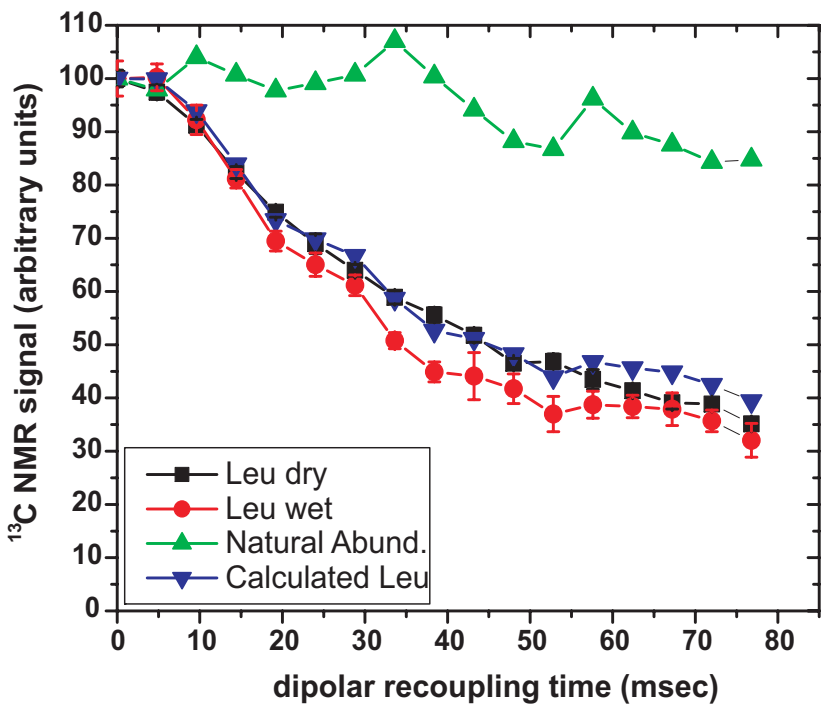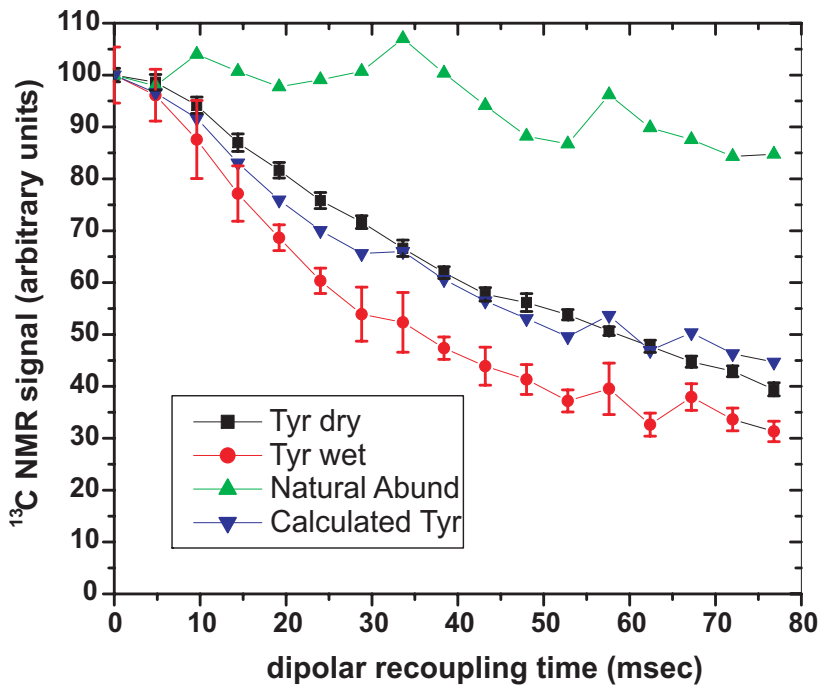

Supplement: supp_0712032105_12032Fig7.pdf [file supp_0712032105_12032Fig7.pdf]

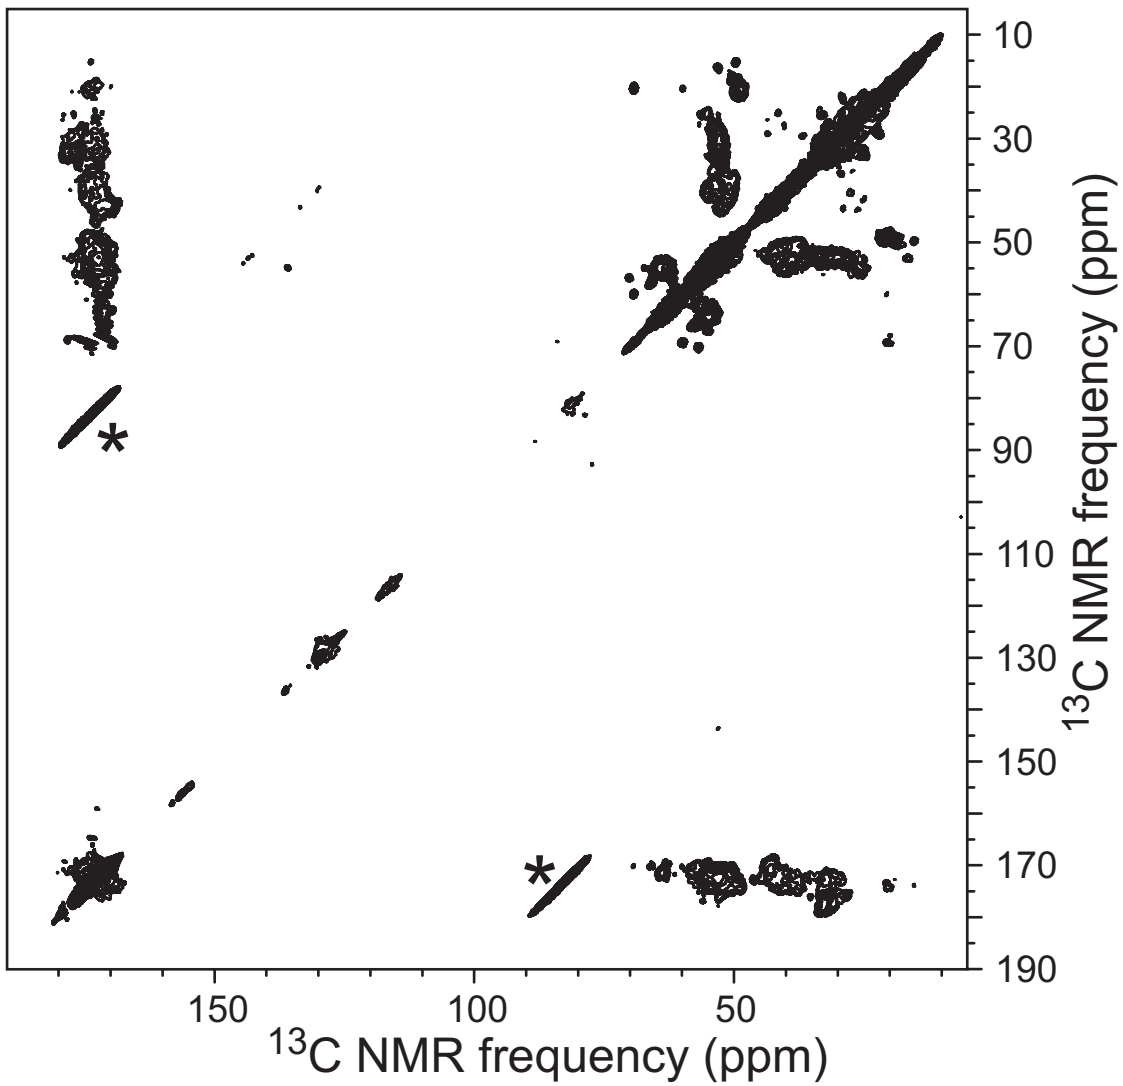

Supplement: supp_0712032105_12032Fig8.pdf [file supp_0712032105_12032Fig8.pdf]

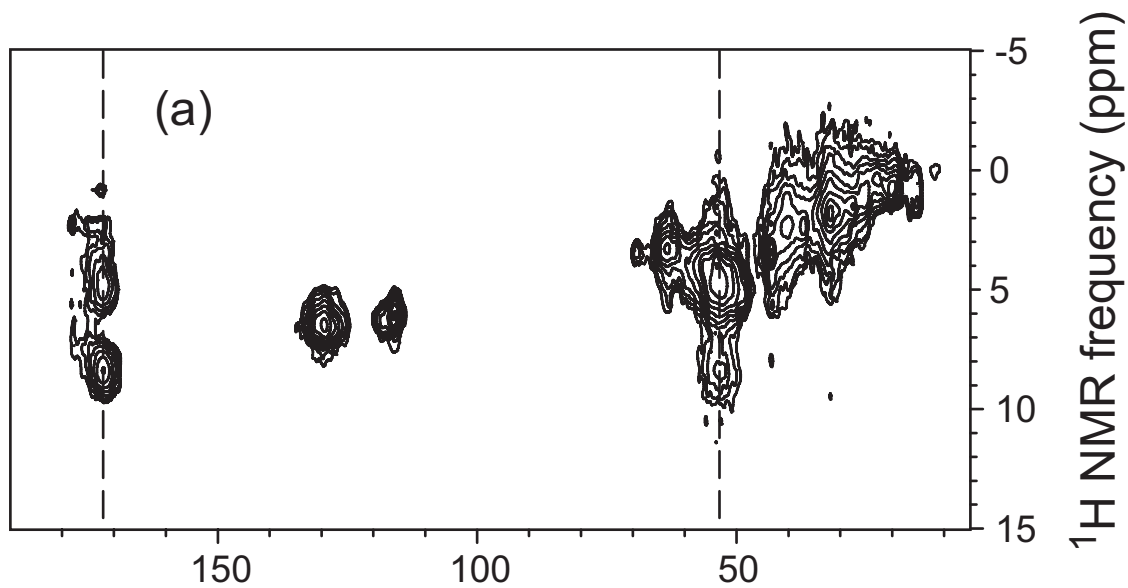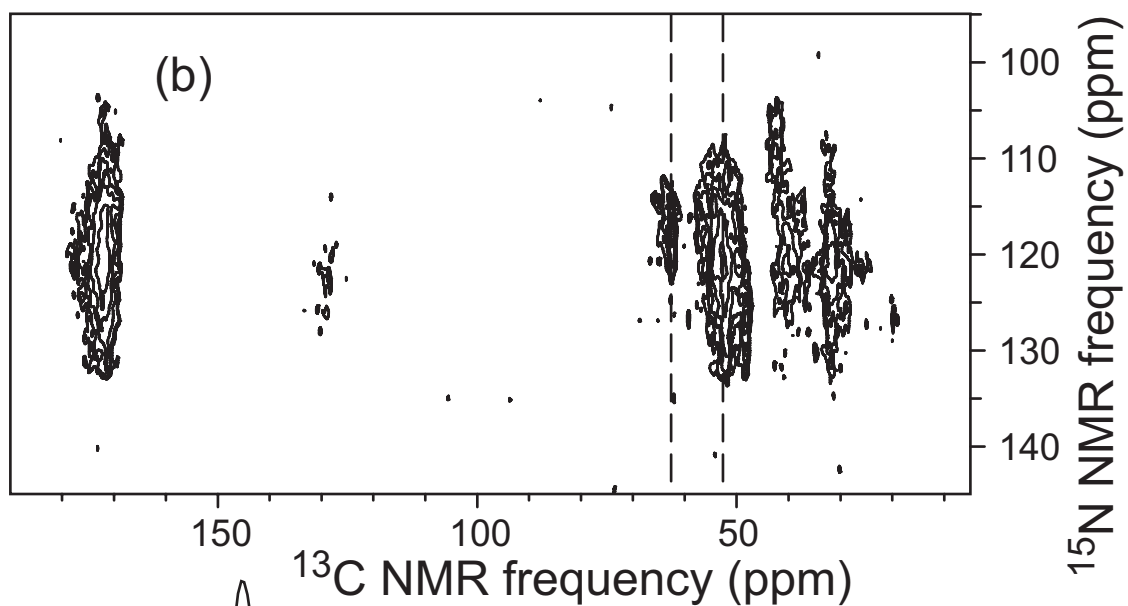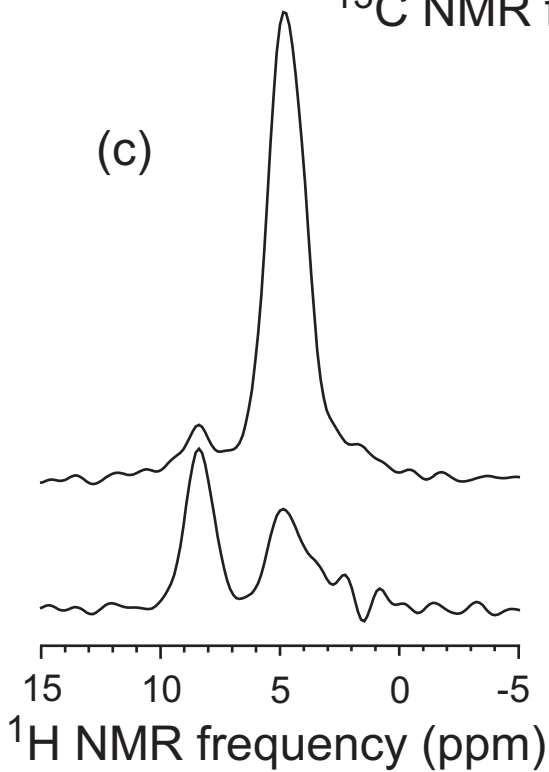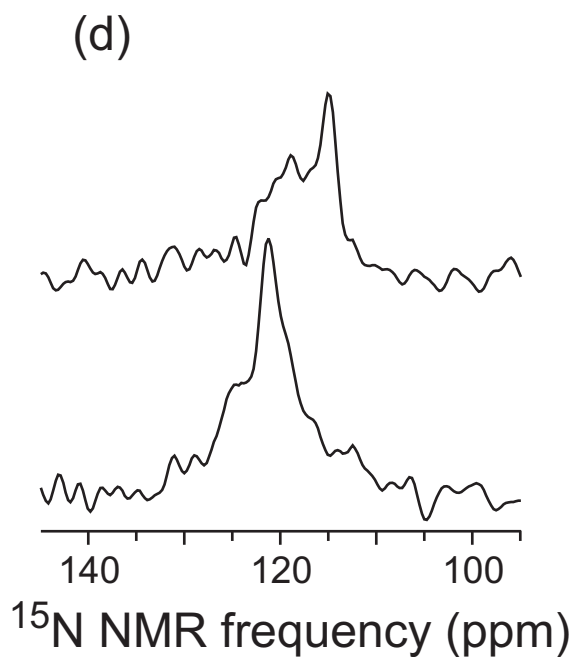

Supplement: supp_0712032105_12032Fig9.pdf [file supp_0712032105_12032Fig9.pdf]
